# Supplementary material for: Hierarchical Ni–Mo–P nanoarrays toward efficient urea oxidation reaction
Source: Royal Society of Chemistry journal article supplement (doi:10.1039/d2dt02983a), 2022-01-01
Supplement: d2dt02983a1.pdf [file d2dt02983a1.pdf]

# Hierarchical Ni-Mo-P nanoarrays toward efficient urea oxidation reaction

Jing Li<sup>a</sup>, Feng Hu<sup>a</sup>, Jinpei Hei<sup>a</sup>, Guoan Liu<sup>c</sup>, Hui Wei<sup>a\*</sup>, Nannan Wang<sup>a\*</sup>, Hehe Wei<sup>b\*</sup>

*<sup>a</sup>Engineering Technology Center of Department of Education of Anhui Province and College of Chemistry and Materials Engineering, Chaohu University, Hefei 238024, PR China.*

*<sup>b</sup>Key Laboratory for Advanced Materials, Center for Computational Chemistry and Research Institute of Industrial Catalysis, East China University of Science and Technology, 130 Meilong Road, Shanghai 200237, China*

*<sup>c</sup>Hefei Ecriee-Tamura Electric Co., Ltd, Hefei 230088, P. R. China*

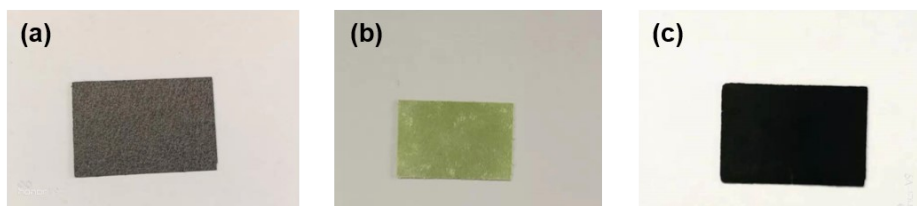

**Figure S1.** The pictures of (a) pure carbon papper; (b) the Ni-Mo precursdor grown on the carbon paper; (c) the Ni-Mo-P/CP sample.

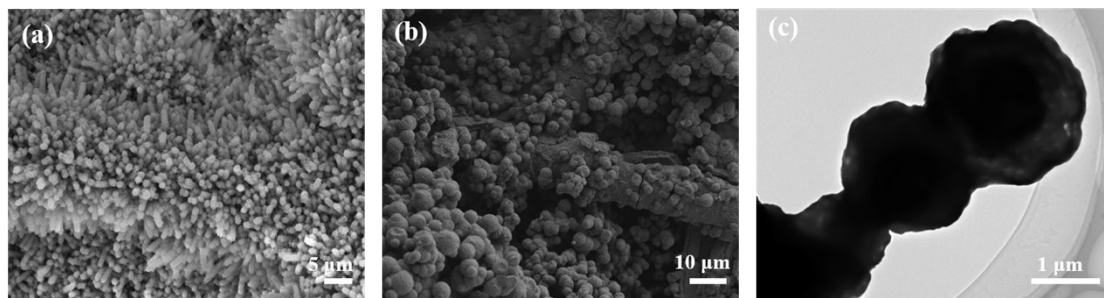

**Figure S2.** Low magnification SEM images of (a) Ni-Mo/CP and (b) Ni/CP precursor.

(c) The TEM image of Ni<sub>2</sub>P/CP sample.

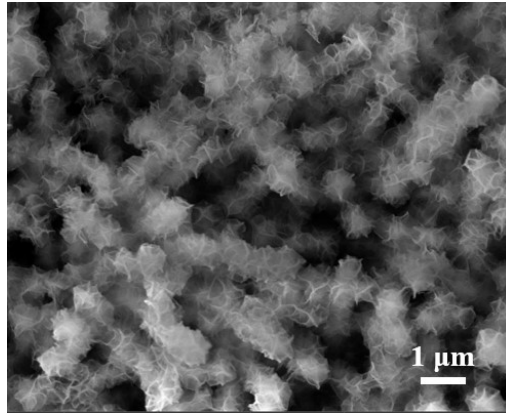

**Figure S3.** SEM image of Ni-Mo-O/CP.

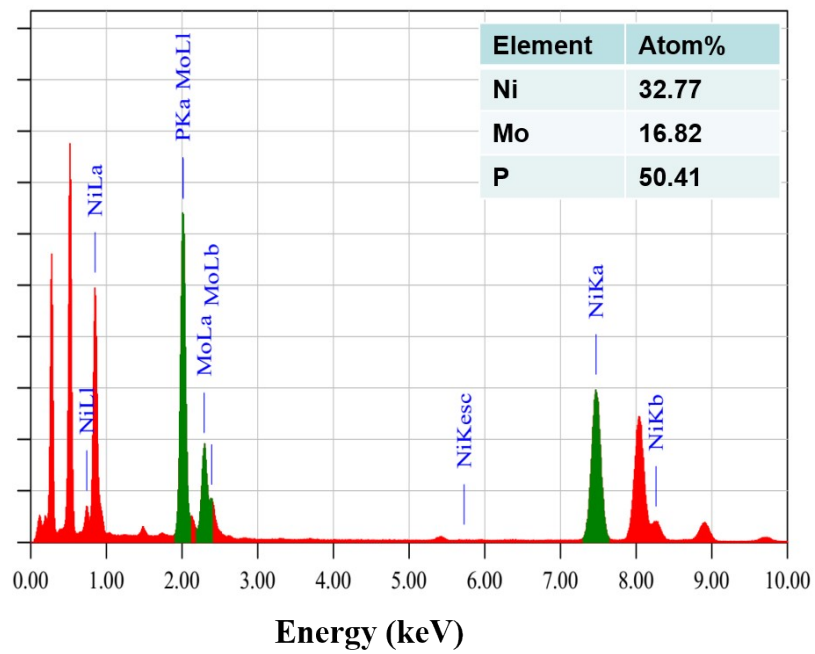

**Figure S4.** The EDX element spectrum of Ni-Mo-P/CP.

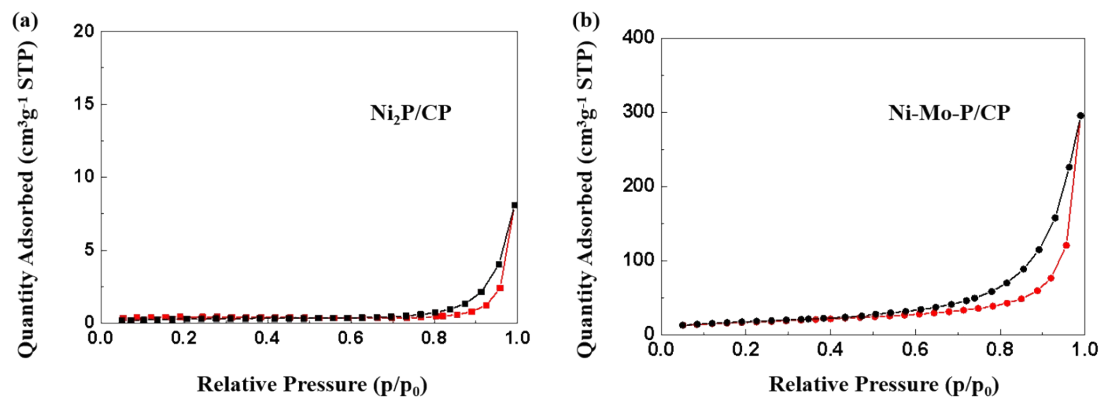

**Figure S5.** The N<sub>2</sub> adsorption and desorption isotherms of (a) Ni<sub>2</sub>P/CP and (b) Ni-Mo-P/CP.

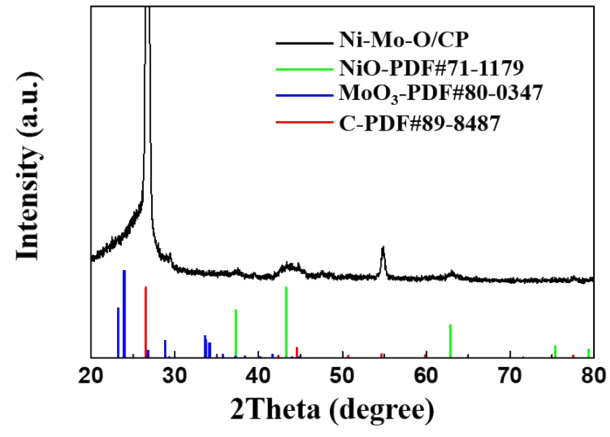

**Figure S6.** The XRD pattern of Ni-Mo-O/CP.

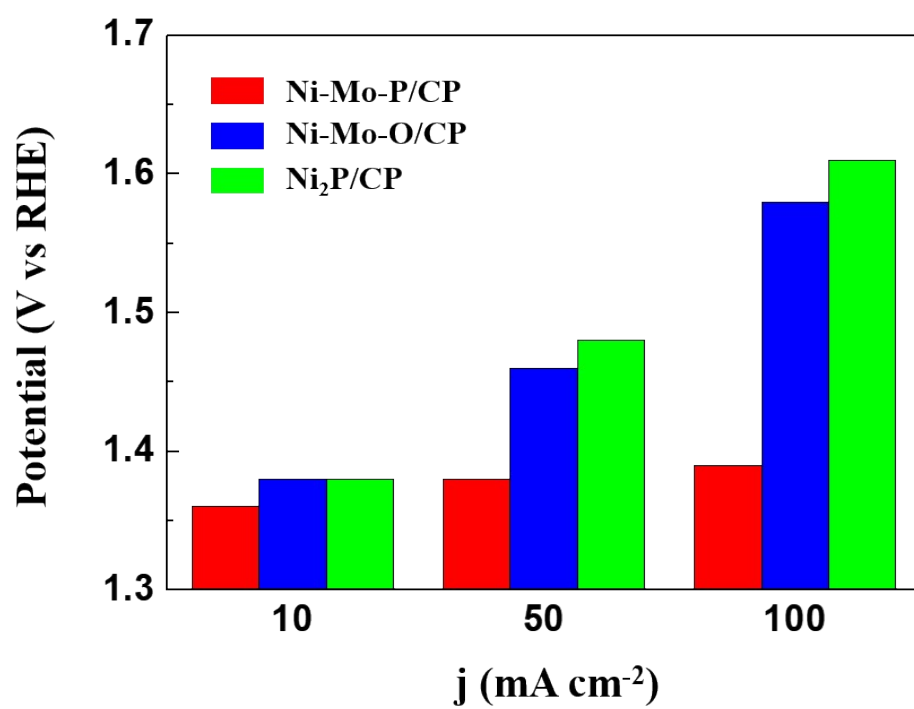

**Figure S7.** Comparison the potentials of various samples for UOR at different current densities.



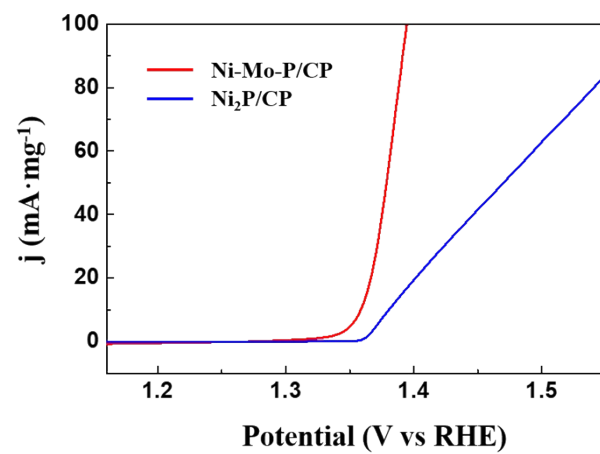

**Figure S8.** LSV curves of Ni-Mo-P/CP and Ni<sub>2</sub>P/CP for UOR.

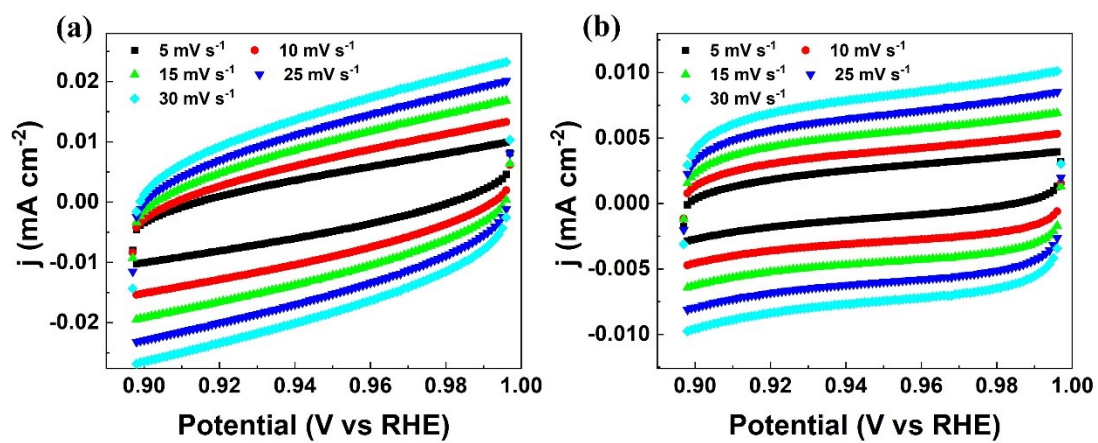

**Figure S9.** CV curves collected at various scan rates of (a) Ni-Mo-P/CP; (b) Ni<sub>2</sub>P/CP.

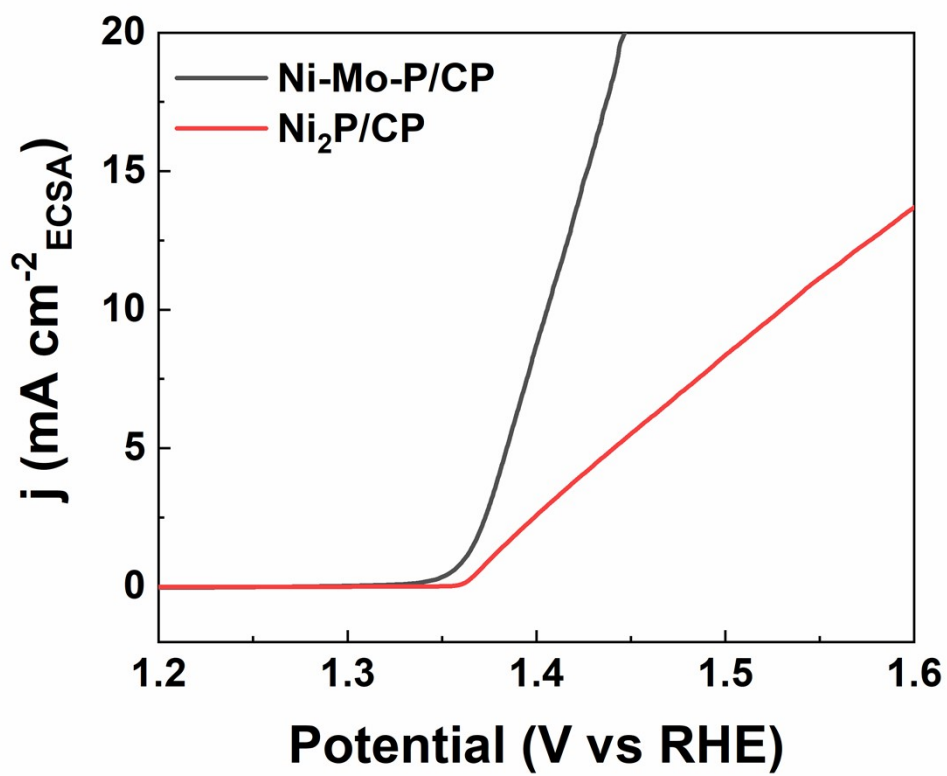

**Figure S10.** UOR activity of Ni-Mo-P/CP and Ni<sub>2</sub>P/CP when the current density normalized by ECSA.

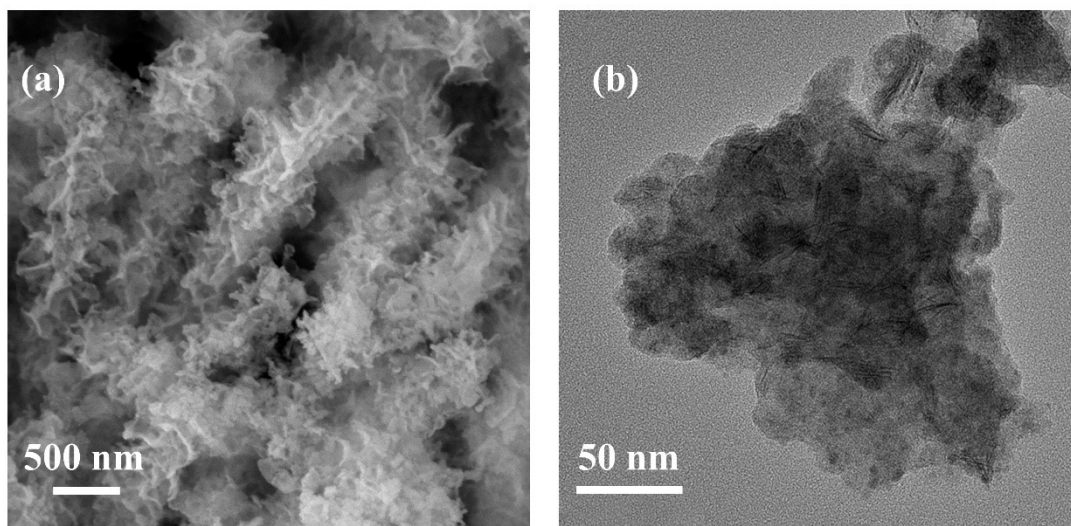

**Figure S11.** (a) SEM and (b) TEM images of Ni-Mo-P/CP after stability test in urea electrolysis.

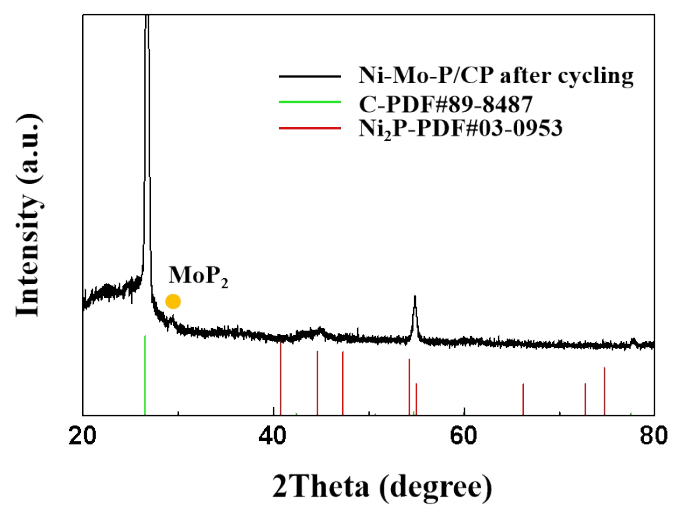

**Figure S12.** The XRD pattern of the Ni-Mo-P/CP after urea electrolysis.

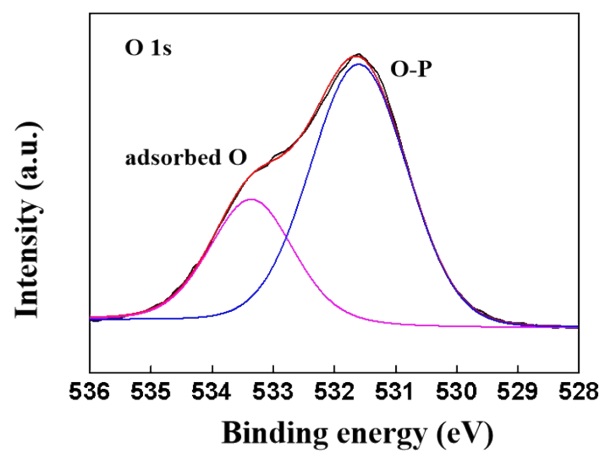

**Figure S13.** The high resolution XPS spectrum of O 1s in initial Ni-Mo-P/CP system.

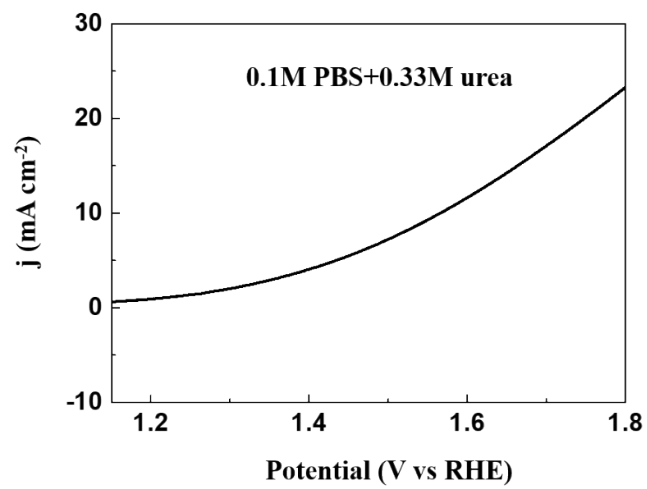

**Figure S14.** LSV curves of Ni-Mo-P/CP in 0.1 M PBS solution with 0.33 M urea for UOR.
